# Supplementary material for: BIN1 protein isoforms are differentially expressed in astrocytes, neurons, and microglia: neuronal and astrocyte BIN1 implicated in Tau pathology
Source: bioRxiv or medRxiv preprint supplement (doi:10.1101/535682), 2019-01-31
Supplement: Supplementary file [file media-1.pdf]

Suppl. Fig. 1

a.

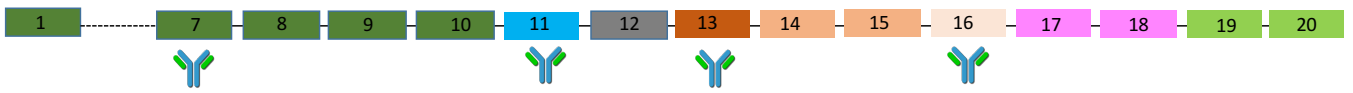

b.

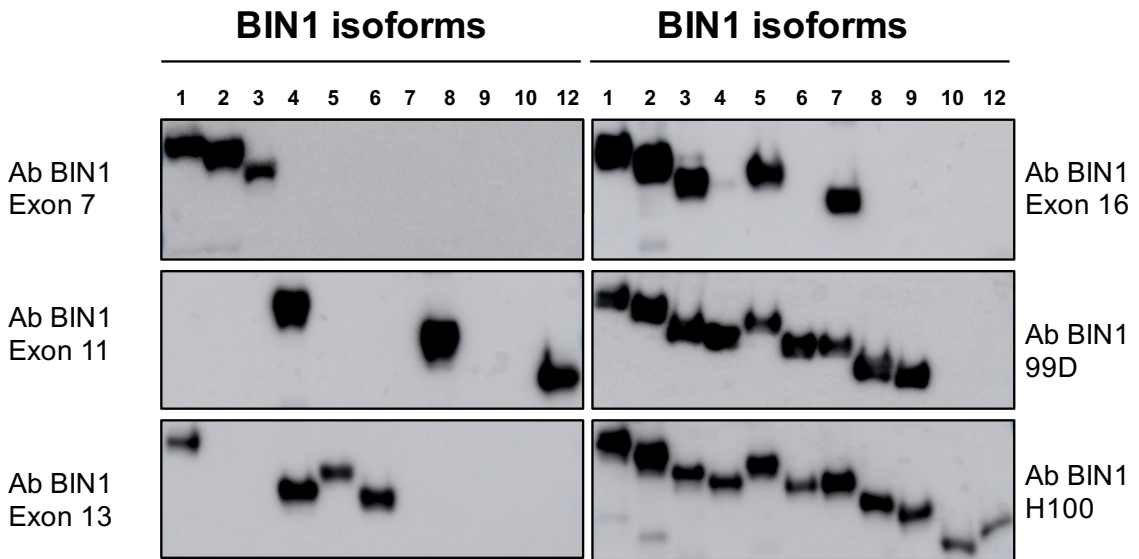

Ab BIN1 Exon 7 (1.0 µg/mL), IHC against 11 isotypes

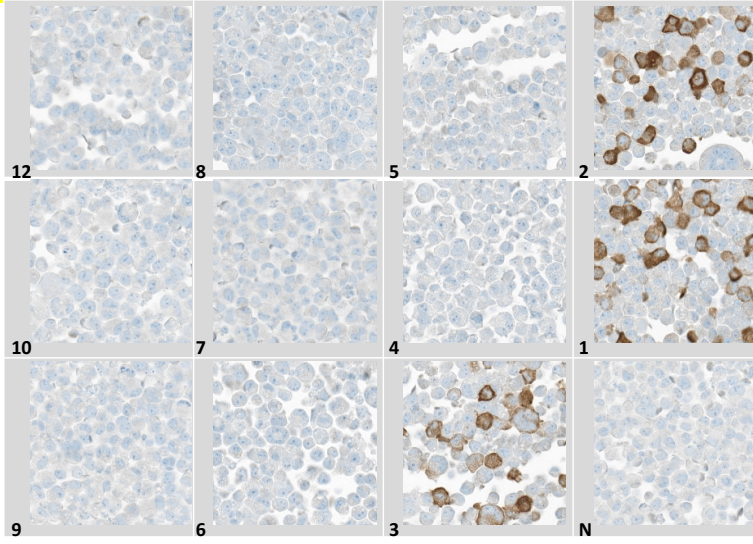

Ab BIN1 Exon 11 (0.25 µg/mL), IHC against 11 isotypes

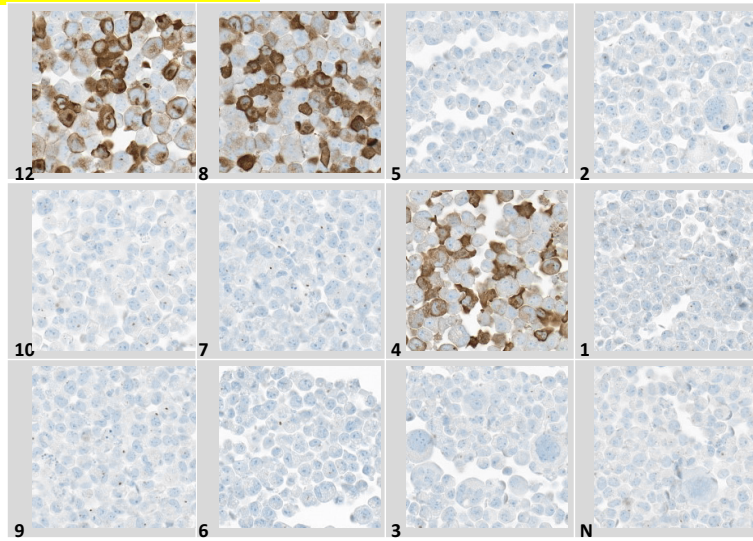

Ab BIN1 Exon 13 (1.0 µg/mL), IHC against 11 isotypes

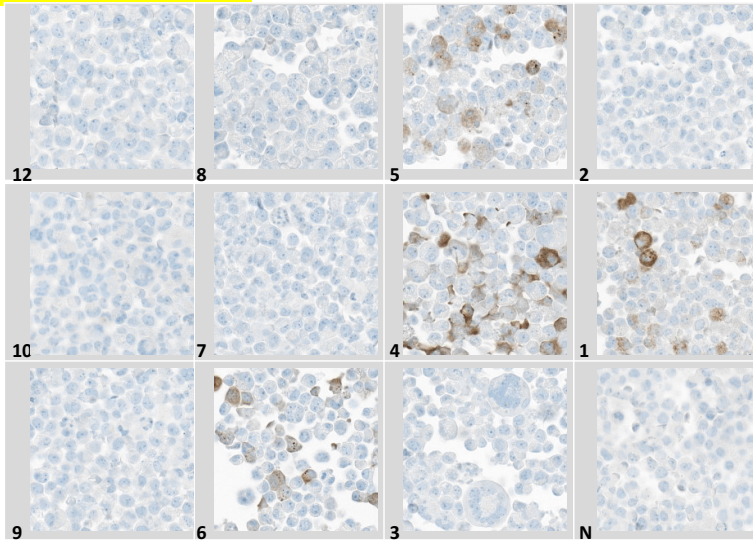

Ab BIN1 Exon 16 (0.25 µg/mL), IHC against 11 isotypes

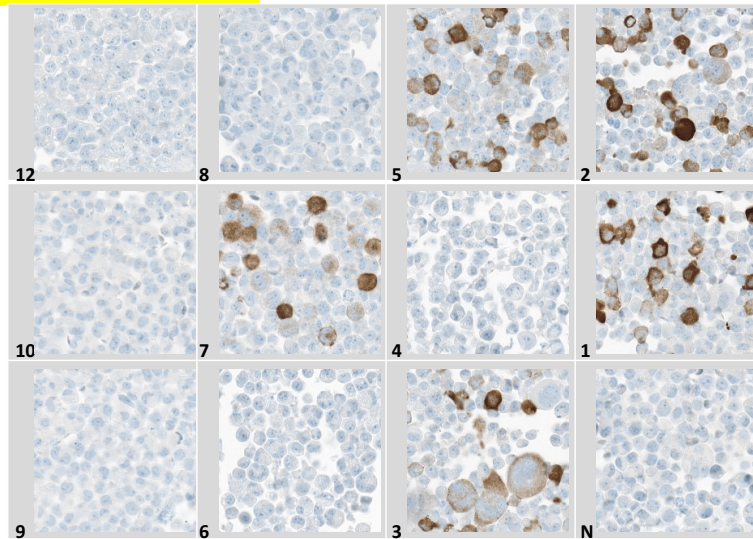



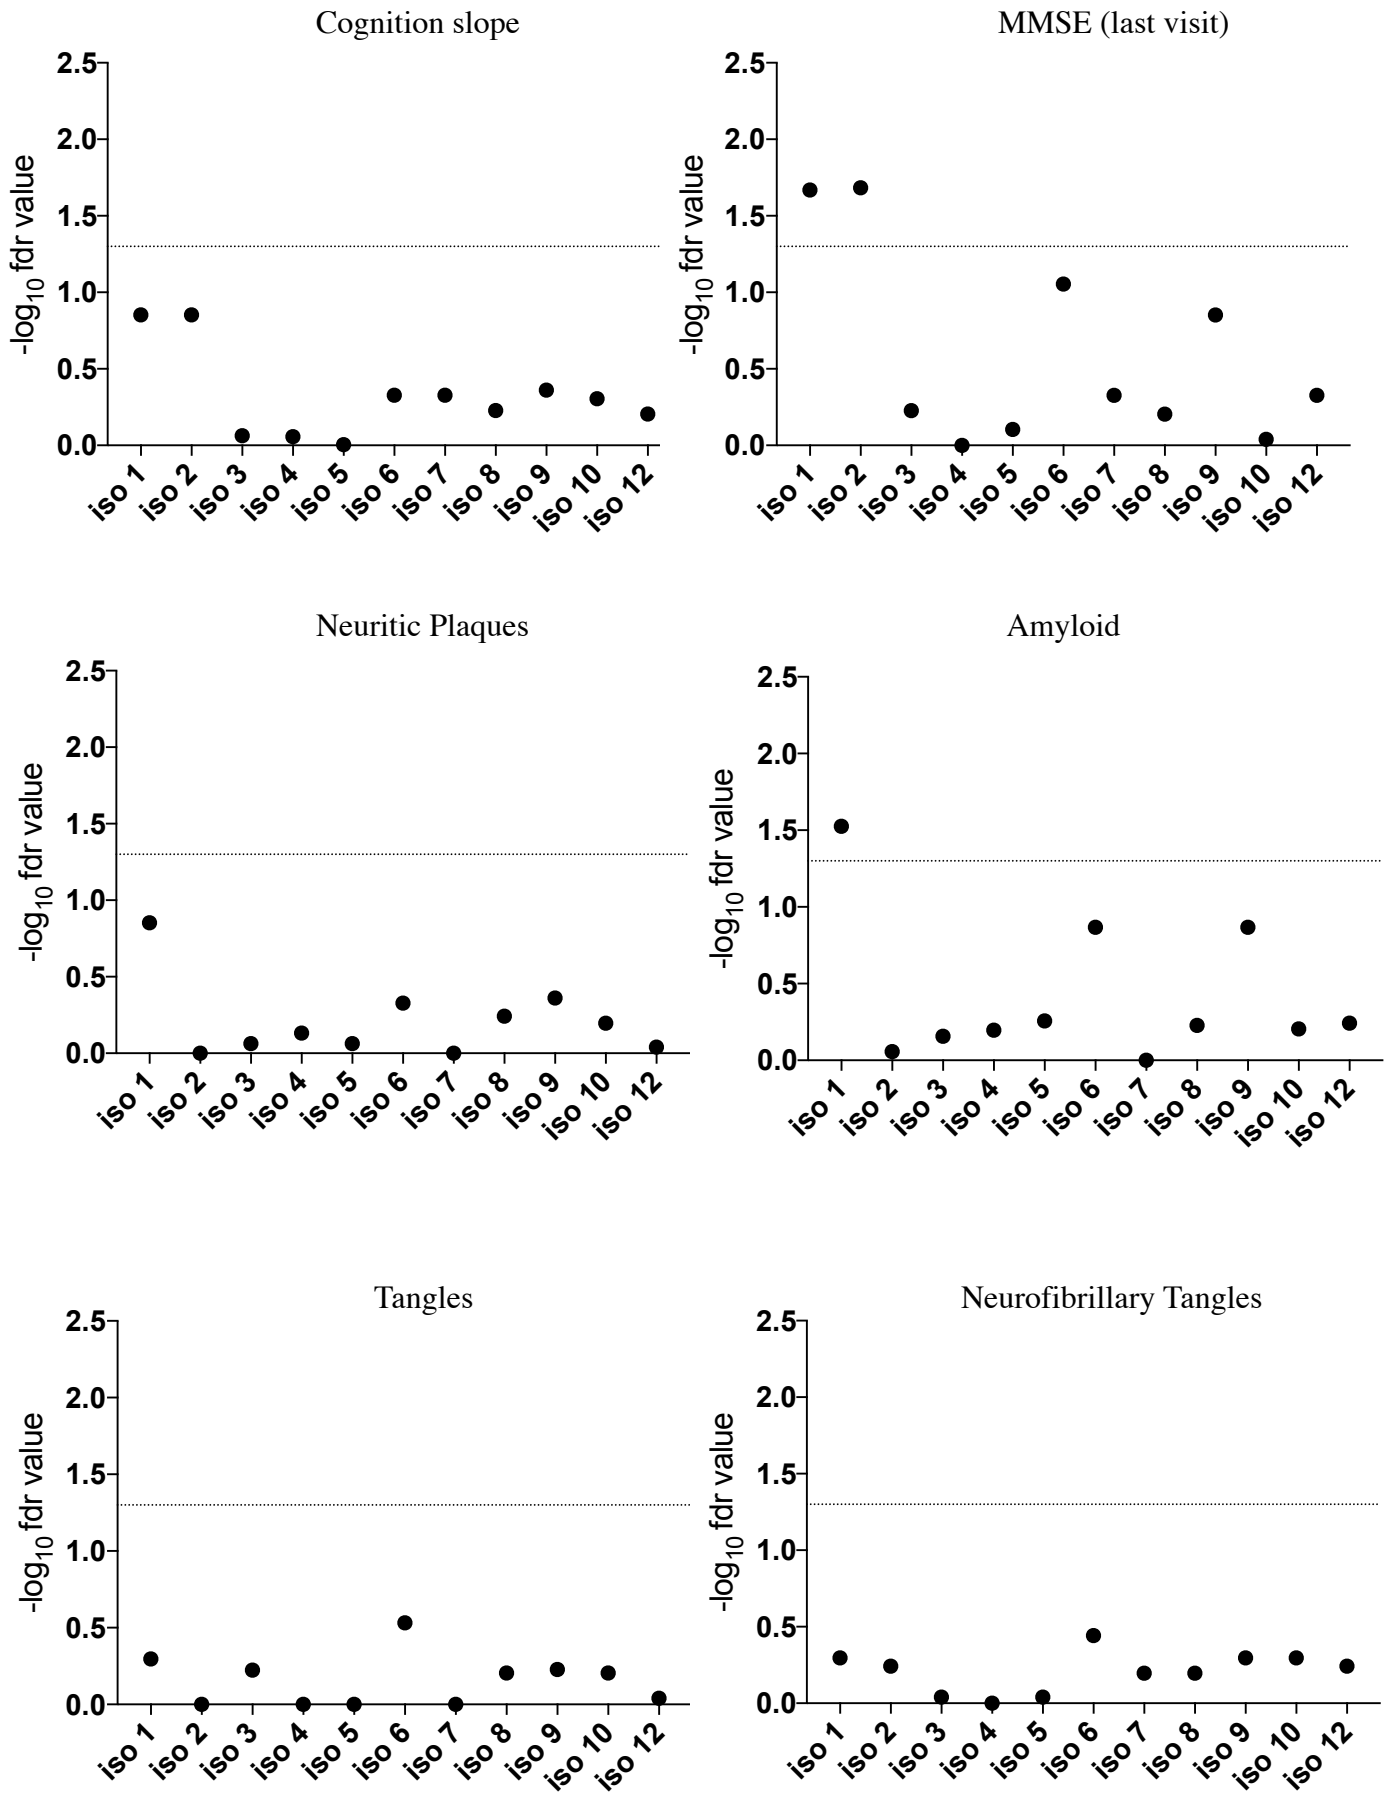

Suppl. Fig. 5

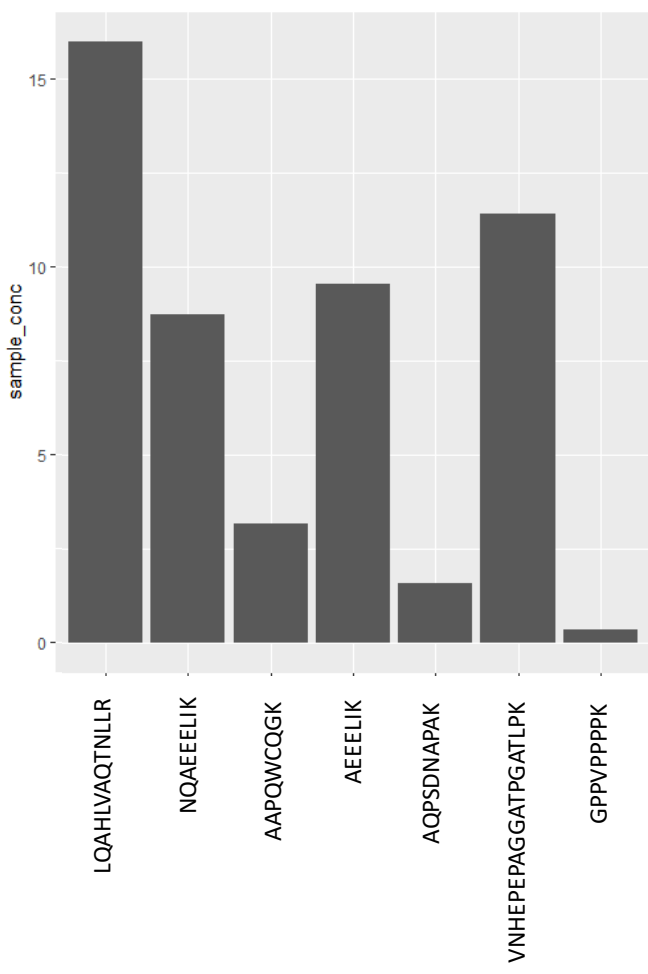

Suppl. Fig. 6

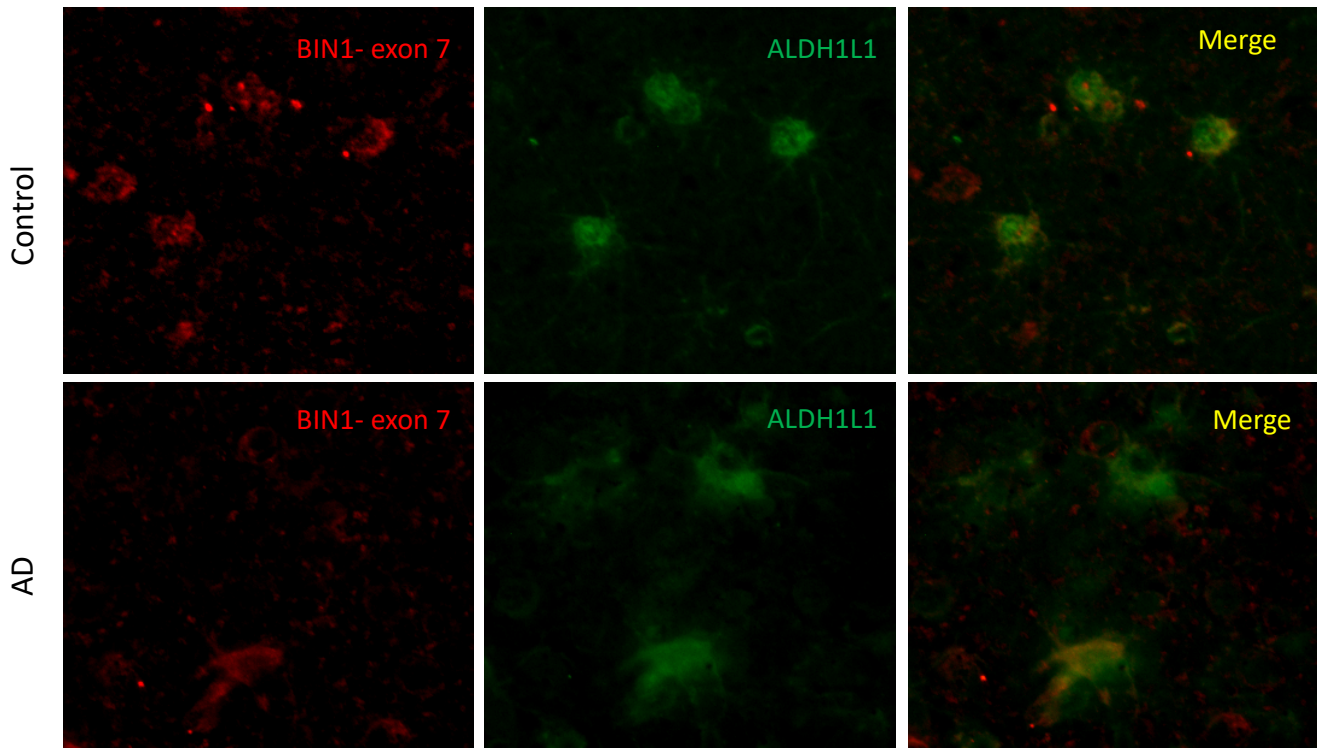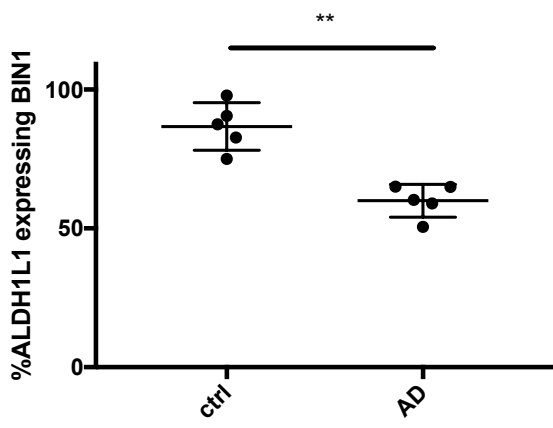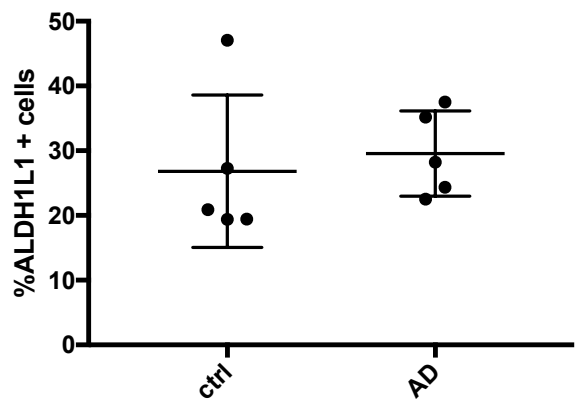

## Suppl. Table 1

|           | cortical RNA-seq (n=508) |           | SRM proteomics (n=1377) |
|-----------|--------------------------|-----------|-------------------------|
| Male      | 38%                      | Male      | 31.70%                  |
| Female    | 62%                      | Female    | 68.300%                 |
| Age_death | 88.4 +- 6.6              | Age_death | 89.4 +- 6.5             |

## Suppl. Table2

| Peptide sequence    | Consequence Rank Score | exon |
|---------------------|------------------------|------|
| LQAHLVAQTNLLR       | 0.544                  | 7    |
| NQAEEELIK           | 0.267                  | 7    |
| AAPQWCQ GK          | 0.255                  | 7    |
| AEEELIK             | 0.215                  | 8    |
| AQPSDNAPAK          | 0.236                  | 10   |
| VNHEPEPAGGATPGATLPK | 0.899                  | 12   |
| GPPVPPPK            | 0.085                  | 13   |

## Suppl. Table 3

| Peptide sequence         | exon  | isoform     |
|--------------------------|-------|-------------|
| AGDVVLVIPFQNPEEQDEGWLMGV | 15-16 | all isoform |
| LNQNLDVIVGLEK            | 9     | all isoform |
| LVDQALLTMDTYLGQFPDIK     | 5     | all isoform |
| VGfYVNTFQSIAGLEENFHK     | 8     | all isoform |
| VNHEPEPAGGATPGATLPK      | 11    | all isoform |
| VQAQHDYTATDDELQLK        | 15    | all isoform |

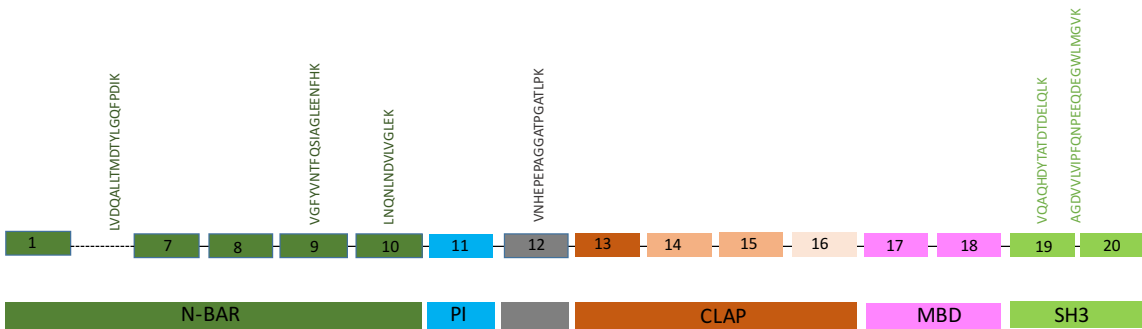

Suppl. Table 4

a.

| BIN1 isoforms | ENST_gencode19  | number of SNPs < 5.57E-5 | number of SNPs < 0.05 |
|---------------|-----------------|--------------------------|-----------------------|
| 1             | ENST00000316724 | 0                        | 73                    |
| 2             | ENST00000357970 | 0                        | 6                     |
| 3             | ENST00000351659 | 0                        | 194                   |
| 4             | ENST00000259238 | 0                        | 3                     |
| 5             | ENST00000346226 | 0                        | 0                     |
| 6             | ENST00000393040 | 0                        | 65                    |
| 7             | ENST00000393041 | 0                        | 127                   |
| 8             | ENST00000352848 | N/A                      | N/A                   |
| 9             | ENST00000409400 | 0                        | 60                    |
| 10            | ENST00000348750 | 0                        | 82                    |
| 12            | ENST00000376113 | 0                        | 57                    |

b.

| Id        | Gencode_id        | chr  | position  | Effective allele | a2 | mac    | Freq | Effect | Stdev | Z     | <i>p</i> |
|-----------|-------------------|------|-----------|------------------|----|--------|------|--------|-------|-------|----------|
| rs1060743 | ENST00000348750.4 | 10,2 | 127826533 | A                | G  | 262.96 | 0.73 | -0.16  | 0.07  | -2.25 | 0.02     |



Suppl. Table 5

| Peptides            | <i>fdr</i> _AD dementia | <i>fdr</i> _Slope of Cognitive Decline | <i>fdr</i> _Residual Cog | <i>fdr</i> _Pathologic Diag. | <i>fdr</i> _Amyloid Patho | <i>fdr</i> _tangles |
|---------------------|-------------------------|----------------------------------------|--------------------------|------------------------------|---------------------------|---------------------|
| LQAHLVAQTNLLR       | 0.026007692             | 0.0002115                              | 0.000780938              | 0.0002954                    | 1.91E-05                  | 1.89E-07            |
| NQAEELIK            | 0.001569167             | 6.98E-05                               | 1.16E-05                 | 6.84E-05                     | 6.26E-08                  | 2.34E-09            |
| AAPQWCQGK           | 0.112397727             | 0.027375                               | 0.026007692              | 0.00358575                   | 0.052181818               | 0.00329921          |
| AEELIK              | 0.553875                | 0.523561644                            | 0.290625                 | 0.253584906                  | 0.013923913               | 0.28254545          |
| AQPSDNAPAK          | 0.770823529             | 0.544090909                            | 0.318559322              | 0.318559322                  | 0.01435                   | 0.11239773          |
| VNHEPEPAGGATPGATLPK | 0.907644231             | 0.811774194                            | 0.523561644              | 0.527837838                  | 0.1579375                 | 0.54759494          |
| GPPVPPPK            | 0.122266667             | 0.028965517                            | 0.026911111              | 0.434538462                  | 0.907644231               | 0.11239773          |

Suppl. Table 6

| Peptides            | <i>fdr</i> _CAA | <i>fdr</i> _ci_num2_gct | <i>fdr</i> _ci_num2_mct | <i>fdr</i> _Lew Body | <i>fdr</i> _Hippocampal Sclerosis | <i>fdr</i> _TDP43 pathology |
|---------------------|-----------------|-------------------------|-------------------------|----------------------|-----------------------------------|-----------------------------|
| LQAHLVAQTNLLR       | 0.033396774     | 0.929                   | 0.845585106             | 0.875357143          | 0.055897059                       | 0.156382979                 |
| NQAEELIK            | 0.033396774     | 0.774375                | 0.888787879             | 0.7425               | 0.16632                           | 0.16632                     |
| AAPQWCQGK           | 0.070291667     | 0.875357143             | 0.771627907             | 0.875357143          | 0.38675                           | 0.501338028                 |
| AEELIK              | 0.544090909     | 0.907644231             | 0.807333333             | 0.697048193          | 0.656890244                       | 0.501338028                 |
| AQPSDNAPAK          | 0.849947368     | 0.076263158             | 0.547594937             | 0.907644231          | 0.58462963                        | 0.791629213                 |
| VNHEPEPAGGATPGATLPK | 0.470149254     | 0.811774194             | 0.774375                | 0.397622951          | 0.811774194                       | 0.486397059                 |
| GPPVPPPK            | 0.09555         | 0.907644231             | 0.544090909             | 0.172941176          | 0.451818182                       | 0.434538462                 |

Suppl. Table 7

| Peptides            | <i>fdr</i> _AD dementia | <i>fdr</i> _Slope of Cognitive Decline | <i>fdr</i> _Residual Cog | <i>fdr</i> _Pathologic Diag. | <i>fdr</i> _Amyloid Patho | <i>fdr</i> _tangles |
|---------------------|-------------------------|----------------------------------------|--------------------------|------------------------------|---------------------------|---------------------|
| LQAHLVAQTNLLR       | 0.833269231             | 0.159                                  | 0.2905                   | 0.036                        | 0.0105                    | 0.02044875          |
| NQAEELIK            | 0.853915663             | 0.7940625                              | 0.792105263              | 0.036                        | 0.02044875                | 0.389454545         |
| AAPQWCQGK           | 0.512195122             | 0.448636364                            | 0.448636364              | 0.118363636                  | 0.344842105               | 0.285352941         |
| AEELIK              | 0.920684211             | 0.853915663                            | 0.823636364              | 0.448636364                  | 0.792105263               | 0.9576              |
| AQPSDNAPAK          | 0.448636364             | 0.777                                  | 0.719150943              | 0.862670455                  | 0.823636364               | 0.495833333         |
| VNHEPEPAGGATPGATLPK | 0.823636364             | 0.823636364                            | 0.823636364              | 0.63                         | 0.890217391               | 0.853915663         |
| GPPVPPPK            | 0.823636364             | 0.525                                  | 0.495833333              | 0.512195122                  | 0.7940625                 | 0.814545455         |

Suppl. Table 8

| Peptides            | <i>p</i> _Amyloid_adj | <i>p</i> _Tau_adj |
|---------------------|-----------------------|-------------------|
| AAPQWCQGK           | 0.32                  | 2.58E-05          |
| LQAHLVAQTNLLR       | 0.04                  | 2.11E-06          |
| NQAEELIK            | 0.000762              | 3.40E-05          |
| AEELIK              | 0.0323                | 0.72              |
| AQPSDNAPAK          | 0.0447                | 0.469             |
| VNHEPEPAGGATPGATLPK | 0.103                 | 0.849             |
| GPPVPPPK            | 0.357                 | 0.0134            |

Suppl. Table 9

| Peptide             | Beta_peptide_cogdec | R2_peptide_cogdec | <i>p</i> _peptide_cogdec |
|---------------------|---------------------|-------------------|--------------------------|
| LQAHLVAQTNLLR       | 0.0564              | 0.0148            | 4.63E-05                 |
| NQAEELIK            | 0.0775              | 0.0179            | 7.34E-06                 |
| AAPQWCQGK           | 0.0287              | 0.00553           | 0.013                    |
| AEELIK              | -0.00473            | 0.00201           | 0.134                    |
| AQPSDNAPAK          | -0.00497            | 0.00117           | 0.254                    |
| VNHEPEPAGGATPGATLPK | -0.00547            | 0.000736          | 0.365                    |
| GPPVPPPK            | 0.0262              | 0.00315           | 0.0605                   |

| Beta_tau_cogdec | R2_tangles_cogdec | <i>p</i> _tangles_cogdec |
|-----------------|-------------------|--------------------------|
| -0.0327         | 0.2               | 7.59E-67                 |

| Peptide             | Beta_peptide_cogdec_jt | R2_peptide_cogdec_jt | <i>p</i> _peptide_cogdec_jt | Beta_tangles_cogdec_jt | R2_tangles_cogdec_jt | <i>p</i> _tangles_cogdec_jt |
|---------------------|------------------------|----------------------|-----------------------------|------------------------|----------------------|-----------------------------|
| LQAHLVAQTNLLR       | 0.029                  | 0.00488              | 0.0202                      | -0.0332                | 0.197                | 1.59E-54                    |
| NQAEELIK            | 0.0377                 | 0.00531              | 0.0153                      | -0.0331                | 0.196                | 3.22E-54                    |
| AAPQWCQGK           | 0.0138                 | 0.00163              | 0.18                        | -0.0333                | 0.199                | 5.36E-55                    |
| AEELIK              | -0.0047                | 0.00256              | 0.0927                      | -0.0339                | 0.207                | 1.65E-57                    |
| AQPSDNAPAK          | -0.00404               | 0.000999             | 0.295                       | -0.0337                | 0.204                | 2.98E-56                    |
| VNHEPEPAGGATPGATLPK | -0.0063                | 0.00126              | 0.238                       | -0.0339                | 0.207                | 1.99E-57                    |
| GPPVPPPK            | 0.00697                | 0.000285             | 0.575                       | -0.0338                | 0.204                | 1.07E-56                    |

Suppl. Table 10

| SNP        | Peptides            | beta      | se      | tstat    | pval   | n    | df     |
|------------|---------------------|-----------|---------|----------|--------|------|--------|
| rs10498633 | LQAHVLAQTNLLR       | -0.0022   | 0.0114  | -0.194   | 0.846  | 1018 | 5,1013 |
| rs10498633 | NQAEELIK            | -0.00343  | 0.00893 | -0.384   | 0.701  | 1018 | 5,1013 |
| rs10498633 | AAPQWCQCGK          | -0.0111   | 0.0127  | -0.876   | 0.381  | 1015 | 5,1010 |
| rs10498633 | AEEELIK             | -0.0257   | 0.0505  | -0.508   | 0.611  | 1018 | 5,1013 |
| rs10498633 | AQPSDNAPAK          | 0.00223   | 0.0368  | 0.0607   | 0.952  | 1012 | 5,1007 |
| rs10498633 | VNHEPEPAGGATPGATLPK | -0.0137   | 0.0265  | -0.517   | 0.605  | 1017 | 5,1012 |
| rs10498633 | GPPVPPPPK           | -0.0055   | 0.0113  | -0.485   | 0.628  | 1018 | 5,1013 |
| rs10792832 | LQAHVLAQTNLLR       | 0.00533   | 0.01    | 0.531    | 0.596  | 1018 | 5,1013 |
| rs10792832 | NQAEELIK            | 0.0147    | 0.00788 | 1.86     | 0.0631 | 1018 | 5,1013 |
| rs10792832 | AAPQWCQCGK          | -0.00608  | 0.0112  | -0.542   | 0.588  | 1015 | 5,1010 |
| rs10792832 | AEEELIK             | -0.0803   | 0.0446  | -1.8     | 0.0722 | 1018 | 5,1013 |
| rs10792832 | AQPSDNAPAK          | -0.0128   | 0.0325  | -0.395   | 0.693  | 1012 | 5,1007 |
| rs10792832 | VNHEPEPAGGATPGATLPK | -0.0286   | 0.0234  | -1.22    | 0.222  | 1017 | 5,1012 |
| rs10792832 | GPPVPPPPK           | -0.0152   | 0.01    | -1.52    | 0.129  | 1018 | 5,1013 |
| rs10838725 | LQAHVLAQTNLLR       | -0.00383  | 0.0105  | -0.364   | 0.716  | 1018 | 5,1013 |
| rs10838725 | NQAEELIK            | -0.0026   | 0.00827 | -0.314   | 0.753  | 1018 | 5,1013 |
| rs10838725 | AAPQWCQCGK          | -0.0124   | 0.0117  | -1.05    | 0.293  | 1015 | 5,1010 |
| rs10838725 | AEEELIK             | 0.0197    | 0.0468  | 0.42     | 0.675  | 1018 | 5,1013 |
| rs10838725 | AQPSDNAPAK          | -0.0263   | 0.034   | -0.773   | 0.44   | 1012 | 5,1007 |
| rs10838725 | VNHEPEPAGGATPGATLPK | 0.0304    | 0.0245  | 1.24     | 0.216  | 1017 | 5,1012 |
| rs10838725 | GPPVPPPPK           | 0.00472   | 0.0105  | 0.449    | 0.653  | 1018 | 5,1013 |
| rs10948363 | LQAHVLAQTNLLR       | -0.0192   | 0.0109  | -1.76    | 0.0792 | 1018 | 5,1013 |
| rs10948363 | NQAEELIK            | -0.0196   | 0.0086  | -2.27    | 0.0231 | 1018 | 5,1013 |
| rs10948363 | AAPQWCQCGK          | -0.0136   | 0.0122  | -1.11    | 0.268  | 1015 | 5,1010 |
| rs10948363 | AEEELIK             | 0.0223    | 0.0488  | 0.456    | 0.649  | 1018 | 5,1013 |
| rs10948363 | AQPSDNAPAK          | 0.00882   | 0.0356  | 0.248    | 0.804  | 1012 | 5,1007 |
| rs10948363 | VNHEPEPAGGATPGATLPK | 0.0139    | 0.0256  | 0.543    | 0.587  | 1017 | 5,1012 |
| rs10948363 | GPPVPPPPK           | -0.00565  | 0.0109  | -0.517   | 0.606  | 1018 | 5,1013 |
| rs11218343 | LQAHVLAQTNLLR       | -0.00627  | 0.0267  | -0.234   | 0.815  | 1018 | 5,1013 |
| rs11218343 | NQAEELIK            | -0.00969  | 0.021   | -0.461   | 0.645  | 1018 | 5,1013 |
| rs11218343 | AAPQWCQCGK          | -0.0192   | 0.0298  | -0.643   | 0.52   | 1015 | 5,1010 |
| rs11218343 | AEEELIK             | 0.0126    | 0.0119  | 1.06     | 0.196  | 1018 | 5,1013 |
| rs11218343 | AQPSDNAPAK          | -0.0237   | 0.087   | -0.273   | 0.785  | 1012 | 5,1007 |
| rs11218343 | VNHEPEPAGGATPGATLPK | 0.0106    | 0.0624  | 0.17     | 0.865  | 1017 | 5,1012 |
| rs11218343 | GPPVPPPPK           | -0.000202 | 0.0267  | -0.00758 | 0.994  | 1018 | 5,1013 |
| rs1171812  | LQAHVLAQTNLLR       | 0.00831   | 0.0095  | 0.875    | 0.382  | 1018 | 5,1013 |
| rs1171812  | NQAEELIK            | 0.0132    | 0.00747 | 1.77     | 0.0776 | 1018 | 5,1013 |
| rs1171812  | AAPQWCQCGK          | 0.0216    | 0.0106  | 2.04     | 0.0419 | 1015 | 5,1010 |
| rs1171812  | AEEELIK             | -0.0295   | 0.0423  | -0.697   | 0.486  | 1018 | 5,1013 |
| rs1171812  | AQPSDNAPAK          | -0.00562  | 0.0308  | -0.182   | 0.855  | 1012 | 5,1007 |
| rs1171812  | VNHEPEPAGGATPGATLPK | -0.0131   | 0.0222  | -0.589   | 0.556  | 1017 | 5,1012 |
| rs1171812  | GPPVPPPPK           | 0.00985   | 0.00949 | 1.04     | 0.3    | 1018 | 5,1013 |
| rs11771145 | LQAHVLAQTNLLR       | 0.00532   | 0.0114  | 0.465    | 0.642  | 1018 | 5,1013 |
| rs11771145 | NQAEELIK            | 0.00694   | 0.009   | 0.771    | 0.441  | 1018 | 5,1013 |
| rs11771145 | AAPQWCQCGK          | 0.01109   | 0.0128  | 0.0849   | 0.932  | 1015 | 5,1010 |
| rs11771145 | AEEELIK             | -0.0856   | 0.0509  | -1.68    | 0.093  | 1018 | 5,1013 |
| rs11771145 | AQPSDNAPAK          | -0.037    | 0.0371  | -0.996   | 0.319  | 1012 | 5,1007 |
| rs11771145 | VNHEPEPAGGATPGATLPK | -0.0396   | 0.0267  | -1.49    | 0.138  | 1017 | 5,1012 |
| rs11771145 | GPPVPPPPK           | 0.00982   | 0.0114  | 0.86     | 0.39   | 1018 | 5,1013 |
| rs12444183 | LQAHVLAQTNLLR       | 0.00205   | 0.01    | 0.205    | 0.838  | 1018 | 5,1013 |
| rs12444183 | NQAEELIK            | -0.0043   | 0.00789 | -0.545   | 0.586  | 1018 | 5,1013 |
| rs12444183 | AAPQWCQCGK          | -0.0105   | 0.0112  | -0.935   | 0.35   | 1015 | 5,1010 |
| rs12444183 | AEEELIK             | 0.0392    | 0.0447  | 0.878    | 0.38   | 1018 | 5,1013 |
| rs12444183 | AQPSDNAPAK          | -0.0285   | 0.0325  | -0.877   | 0.381  | 1012 | 5,1007 |
| rs12444183 | VNHEPEPAGGATPGATLPK | 0.0213    | 0.0234  | 0.909    | 0.364  | 1017 | 5,1012 |
| rs12444183 | GPPVPPPPK           | -0.000817 | 0.01    | -0.0815  | 0.935  | 1018 | 5,1013 |
| rs1476679  | LQAHVLAQTNLLR       | -0.0172   | 0.0105  | -1.64    | 0.1    | 1018 | 5,1013 |
| rs1476679  | NQAEELIK            | 0.00479   | 0.00824 | 0.581    | 0.561  | 1018 | 5,1013 |
| rs1476679  | AAPQWCQCGK          | -0.00233  | 0.0117  | -0.199   | 0.842  | 1015 | 5,1010 |
| rs1476679  | AEEELIK             | -0.0192   | 0.0466  | -0.411   | 0.681  | 1018 | 5,1013 |
| rs1476679  | AQPSDNAPAK          | -0.0504   | 0.0339  | -1.49    | 0.138  | 1012 | 5,1007 |
| rs1476679  | VNHEPEPAGGATPGATLPK | -0.017    | 0.0245  | -0.695   | 0.487  | 1017 | 5,1012 |
| rs1476679  | GPPVPPPPK           | 0.000948  | 0.0105  | 0.0907   | 0.928  | 1018 | 5,1013 |
| rs17125944 | LQAHVLAQTNLLR       | -0.016    | 0.0169  | -0.95    | 0.342  | 1018 | 5,1013 |
| rs17125944 | NQAEELIK            | -0.00259  | 0.0133  | -0.195   | 0.845  | 1018 | 5,1013 |
| rs17125944 | AAPQWCQCGK          | -0.00728  | 0.0188  | -0.387   | 0.699  | 1015 | 5,1010 |
| rs17125944 | AEEELIK             | 0.0515    | 0.0751  | 0.686    | 0.493  | 1018 | 5,1013 |
| rs17125944 | AQPSDNAPAK          | 0.0141    | 0.0547  | 0.258    | 0.797  | 1012 | 5,1007 |
| rs17125944 | VNHEPEPAGGATPGATLPK | 0.00547   | 0.0393  | 0.139    | 0.89   | 1017 | 5,1012 |
| rs17125944 | GPPVPPPPK           | 0.00316   | 0.0168  | 0.188    | 0.851  | 1018 | 5,1013 |
| rs190982   | LQAHVLAQTNLLR       | 0.00709   | 0.0106  | 0.668    | 0.504  | 1018 | 5,1013 |
| rs190982   | NQAEELIK            | -0.00208  | 0.00835 | -0.249   | 0.804  | 1018 | 5,1013 |
| rs190982   | AAPQWCQCGK          | 0.00266   | 0.0119  | 0.224    | 0.823  | 1015 | 5,1010 |
| rs190982   | AEEELIK             | -0.0298   | 0.0473  | -0.63    | 0.529  | 1018 | 5,1013 |
| rs190982   | AQPSDNAPAK          | -0.0178   | 0.0344  | -0.518   | 0.605  | 1012 | 5,1007 |
| rs190982   | VNHEPEPAGGATPGATLPK | -0.0136   | 0.0248  | -0.551   | 0.582  | 1017 | 5,1012 |
| rs190982   | GPPVPPPPK           | 0.00721   | 0.0106  | 0.68     | 0.497  | 1018 | 5,1013 |
| rs2718058  | LQAHVLAQTNLLR       | -0.0198   | 0.0105  | -1.89    | 0.0586 | 1018 | 5,1013 |
| rs2718058  | NQAEELIK            | -0.00316  | 0.00826 | -0.382   | 0.702  | 1018 | 5,1013 |
| rs2718058  | AAPQWCQCGK          | -0.00266  | 0.0118  | -0.227   | 0.982  | 1015 | 5,1010 |
| rs2718058  | AEEELIK             | -0.0293   | 0.0468  | -0.626   | 0.531  | 1018 | 5,1013 |
| rs2718058  | AQPSDNAPAK          | -0.0104   | 0.0341  | -0.304   | 0.761  | 1012 | 5,1007 |
| rs2718058  | VNHEPEPAGGATPGATLPK | -0.0157   | 0.0245  | -0.643   | 0.521  | 1017 | 5,1012 |
| rs2718058  | GPPVPPPPK           | -0.00641  | 0.0105  | -0.612   | 0.541  | 1018 | 5,1013 |
| rs28834970 | LQAHVLAQTNLLR       | -0.0128   | 0.0101  | -1.26    | 0.207  | 1018 | 5,1013 |
| rs28834970 | NQAEELIK            | 0.00872   | 0.00796 | 1.1      | 0.273  | 1018 | 5,1013 |
| rs28834970 | AAPQWCQCGK          | 0.0234    | 0.0113  | 2.08     | 0.0379 | 1015 | 5,1010 |
| rs28834970 | AEEELIK             | 0.0317    | 0.0451  | 0.704    | 0.481  | 1018 | 5,1013 |
| rs28834970 | AQPSDNAPAK          | 0.0325    | 0.0327  | 0.992    | 0.322  | 1012 | 5,1007 |
| rs28834970 | VNHEPEPAGGATPGATLPK | 0.0175    | 0.0236  | 0.742    | 0.458  | 1017 | 5,1012 |
| rs28834970 | GPPVPPPPK           | 0.0196    | 0.0101  | 1.94     | 0.0522 | 1018 | 5,1013 |

| SNP        | Peptides            | beta      | se      | tstat   | pval   | n    | df     |
|------------|---------------------|-----------|---------|---------|--------|------|--------|
| rs35349669 | LQAHVLAQTNLLR       | -0.00368  | 0.0107  | -0.343  | 0.732  | 1018 | 5,1013 |
| rs35349669 | NQAEELIK            | -0.00533  | 0.00844 | -0.631  | 0.528  | 1018 | 5,1013 |
| rs35349669 | AAPQWCQCGK          | 0.000858  | 0.012   | 0.0716  | 0.943  | 1015 | 5,1010 |
| rs35349669 | AEEELIK             | 0.0186    | 0.0478  | 0.389   | 0.697  | 1018 | 5,1013 |
| rs35349669 | AQPSDNAPAK          | 0.000725  | 0.0348  | 0.0208  | 0.983  | 1012 | 5,1007 |
| rs35349669 | VNHEPEPAGGATPGATLPK | 0.00949   | 0.025   | 0.379   | 0.705  | 1017 | 5,1012 |
| rs35349669 | GPPVPPPPK           | 0.00798   | 0.0107  | 0.745   | 0.457  | 1018 | 5,1013 |
| rs3865444  | LQAHVLAQTNLLR       | -0.00215  | 0.0105  | -0.206  | 0.837  | 1018 | 5,1013 |
| rs3865444  | NQAEELIK            | -0.00322  | 0.00823 | -0.391  | 0.696  | 1018 | 5,1013 |
| rs3865444  | AAPQWCQCGK          | -0.0178   | 0.0117  | -1.53   | 0.127  | 1015 | 5,1010 |
| rs3865444  | AEEELIK             | -0.0246   | 0.0466  | -0.528  | 0.598  | 1018 | 5,1013 |
| rs3865444  | AQPSDNAPAK          | 0.0219    | 0.0339  | 0.647   | 0.518  | 1012 | 5,1007 |
| rs3865444  | VNHEPEPAGGATPGATLPK | -0.00685  | 0.0244  | -0.281  | 0.779  | 1017 | 5,1012 |
| rs3865444  | GPPVPPPPK           | -0.0191   | 0.0104  | -1.83   | 0.0676 | 1018 | 5,1013 |
| rs4147929  | LQAHVLAQTNLLR       | -0.0187   | 0.0141  | -1.32   | 0.186  | 1018 | 5,1013 |
| rs4147929  | NQAEELIK            | -0.000184 | 0.0111  | -0.0166 | 0.987  | 1018 | 5,1013 |
| rs4147929  | AAPQWCQCGK          | -0.00561  | 0.0158  | -0.355  | 0.722  | 1015 | 5,1010 |
| rs4147929  | AEEELIK             | 0.032     | 0.0629  | 0.508   | 0.612  | 1018 | 5,1013 |
| rs4147929  | AQPSDNAPAK          | 0.052     | 0.0457  | 1.14    | 0.256  | 1012 | 5,1007 |
| rs4147929  | VNHEPEPAGGATPGATLPK | 0.0484    | 0.033   | 1.47    | 0.142  | 1017 | 5,1012 |
| rs4147929  | GPPVPPPPK           | -0.00465  | 0.0141  | -0.329  | 0.742  | 1018 | 5,1013 |
| rs442495   | LQAHVLAQTNLLR       | -0.00222  | 0.0105  | -0.212  | 0.832  | 1018 | 5,1013 |
| rs442495   | NQAEELIK            | -0.00994  | 0.00822 | -1.21   | 0.227  | 1018 | 5,1013 |
| rs442495   | AAPQWCQCGK          | -0.0241   | 0.0117  | -2.07   | 0.0388 | 1015 | 5,1010 |
| rs442495   | AEEELIK             | 0.0153    | 0.0466  | 0.328   | 0.743  | 1018 | 5,1013 |
| rs442495   | AQPSDNAPAK          | -0.0106   | 0.0339  | -0.313  | 0.754  | 1012 | 5,1007 |
| rs442495   | VNHEPEPAGGATPGATLPK | 0.00542   | 0.0244  | 0.222   | 0.824  | 1017 | 5,1012 |
| rs442495   | GPPVPPPPK           | -0.0144   | 0.0104  | -1.38   | 0.169  | 1018 | 5,1013 |
| rs4575098  | LQAHVLAQTNLLR       | -0.00354  | 0.0119  | -0.297  | 0.767  | 1018 | 5,1013 |
| rs4575098  | NQAEELIK            | 0.00227   | 0.00938 | 0.241   | 0.809  | 1018 | 5,1013 |
| rs4575098  | AAPQWCQCGK          | 0.015     | 0.0133  | 1.12    | 0.261  | 1015 | 5,1010 |
| rs4575098  | AEEELIK             | -0.0148   | 0.0531  | -0.278  | 0.781  | 1018 | 5,1013 |
| rs4575098  | AQPSDNAPAK          | 0.0371    | 0.0386  | 0.96    | 0.337  | 1012 | 5,1007 |
| rs4575098  | VNHEPEPAGGATPGATLPK | -0.0191   | 0.0278  | -0.687  | 0.492  | 1017 | 5,1012 |
| rs4575098  | GPPVPPPPK           | -0.000825 | 0.0119  | -0.0693 | 0.945  | 1018 | 5,1013 |
| rs6448453  | LQAHVLAQTNLLR       | 0.0274    | 0.0108  | 2.53    | 0.0115 | 1018 | 5,1013 |
| rs6448453  | NQAEELIK            | 0.00999   | 0.00852 | 1.17    | 0.241  | 1018 | 5,1013 |
| rs6448453  | AAPQWCQCGK          | 0.00987   | 0.0121  | 0.815   | 0.415  | 1015 | 5,1010 |
| rs6448453  | AEEELIK             | -0.0102   | 0.0483  | -0.211  | 0.833  | 1018 | 5,1013 |
| rs6448453  | AQPSDNAPAK          | 0.0111    | 0.0351  | 0.317   | 0.751  | 1012 | 5,1007 |
| rs6448453  | VNHEPEPAGGATPGATLPK | -0.00807  | 0.0253  | -0.319  | 0.75   | 1017 | 5,1012 |
| rs6448453  | GPPVPPPPK           | 0.        |         |         |        |      |        |

Suppl. Table 11

| outcome      | Peptides            | beta    | se     | tstat  | pval   | n   | fdr        |
|--------------|---------------------|---------|--------|--------|--------|-----|------------|
| tangles_sqrt | LQAHLVAQTNLLR       | -0.8    | 0.243  | -3.29  | 0.0011 | 430 | 0.0077     |
| tangles_sqrt | NQAEELIK            | -0.495  | 0.316  | -1.57  | 0.118  | 430 | 0.34533333 |
| tangles_sqrt | AAPQWCQGK           | -0.33   | 0.227  | -1.45  | 0.148  | 430 | 0.34533333 |
| tangles_sqrt | AEEELIK             | 0.00454 | 0.0574 | 0.0791 | 0.937  | 430 | 0.937      |
| tangles_sqrt | AQPSDNAPAK          | -0.051  | 0.0799 | -0.639 | 0.523  | 430 | 0.91525    |
| tangles_sqrt | VNHEPEPAGGATPGATLPK | -0.0294 | 0.108  | -0.271 | 0.786  | 430 | 0.917      |
| tangles_sqrt | GPPVPPPPK           | -0.128  | 0.306  | -0.419 | 0.675  | 430 | 0.917      |

Suppl. Table 12

| Peptides            | covariates                               | beta      | se       | tstat  | pval   | n   | fdr         |
|---------------------|------------------------------------------|-----------|----------|--------|--------|-----|-------------|
| LQAHLVAQTNLLR       | age_death;msex                           | -0.000237 | 0.00021  | -1.13  | 0.261  | 579 | 0.7175      |
| NQAEELIK            | age_death;msex                           | -0.000182 | 0.000156 | -1.17  | 0.242  | 579 | 0.7175      |
| AAPQWCQGK           | age_death;msex                           | -0.000325 | 0.000181 | -1.8   | 0.0725 | 579 | 0.7175      |
| AEEELIK             | age_death;msex                           | 0.000753  | 0.000914 | 0.824  | 0.41   | 579 | 0.7175      |
| AQPSDNAPAK          | age_death;msex                           | 0.000249  | 0.00068  | 0.367  | 0.714  | 578 | 0.768923077 |
| VNHEPEPAGGATPGATLPK | age_death;msex                           | 0.000208  | 0.000474 | 0.438  | 0.661  | 578 | 0.768923077 |
| GPPVPPPPK           | age_death;msex                           | -0.000201 | 0.000162 | -1.24  | 0.215  | 579 | 0.7175      |
| LQAHLVAQTNLLR       | age_death;msex;tangles_sqrt;amyloid_sqrt | -5.45E-05 | 0.00021  | -0.26  | 0.795  | 579 | 0.795       |
| NQAEELIK            | age_death;msex;tangles_sqrt;amyloid_sqrt | -0.000107 | 0.000156 | -0.683 | 0.495  | 579 | 0.768923077 |
| AAPQWCQGK           | age_death;msex;tangles_sqrt;amyloid_sqrt | -0.000261 | 0.000184 | -1.42  | 0.155  | 579 | 0.7175      |
| AEEELIK             | age_death;msex;tangles_sqrt;amyloid_sqrt | 0.000786  | 0.000934 | 0.842  | 0.4    | 579 | 0.7175      |
| AQPSDNAPAK          | age_death;msex;tangles_sqrt;amyloid_sqrt | 0.000271  | 0.000694 | 0.39   | 0.697  | 578 | 0.768923077 |
| VNHEPEPAGGATPGATLPK | age_death;msex;tangles_sqrt;amyloid_sqrt | 0.00026   | 0.000484 | 0.537  | 0.592  | 578 | 0.768923077 |
| GPPVPPPPK           | age_death;msex;tangles_sqrt;amyloid_sqrt | -0.000164 | 0.000166 | -0.988 | 0.324  | 579 | 0.7175      |
